# Supplementary material
Source: publisher site journal article supplement (https://www.spandidos-publications.com/7639/downloadSupplementary)
Supplement: Supplementary file 1 [file downloadSupplementary]

Table SI. In the MASLD, the relationship between the factors at entry and the dLSM2B group.

| dLSM2B/MASLD |                   | Decrease                | Increase                 | P value |
|--------------|-------------------|-------------------------|--------------------------|---------|
| Sex          | Woman             | 18 (75.0)               | 37 (86.0)                | 0.32434 |
|              | Man               | 6 (25.0)                | 6 (14.0)                 |         |
| Age          | n                 | 24                      | 43                       | 0.98957 |
|              | Me(Q1, Q3)        | 62.9 (52.5, 71.1)       | 61.9 (49.6, 72.0)        |         |
| HT           | Hypertension      | 8 (33.3)                | 16 (37.2)                | 0.75104 |
|              | none              | 16 (66.7)               | 27 (62.8)                |         |
| HL           | Hyperlipidemia    | 10 (41.7)               | 15 (34.9)                | 0.58203 |
|              | none              | 14 (58.3)               | 28 (65.1)                |         |
| DM           | none              | 19 (79.2)               | 31 (72.1)                | 0.52348 |
|              | Diabetes mellitus | 5 (20.8)                | 12 (27.9)                |         |
| BMI          | n                 | 24                      | 43                       | 0.96871 |
|              | Me(Q1, Q3)        | 27.6 (25.7, 30.0)       | 27.0 (25.8, 30.4)        |         |
| BMIG         | N                 | 1 (4.2)                 | 2 (4.7)                  | 1.00000 |
|              | Ob                | 23 (95.8)               | 41 (95.3)                |         |
| AST          | n                 | 24                      | 43                       | 0.10343 |
|              | Me(Q1, Q3)        | 66.0 (44.5, 91.0)       | 50.0 (34.3, 80.5)        |         |
| ALT          | n                 | 24                      | 43                       | 0.32339 |
|              | Me(Q1, Q3)        | 74.5 (50.0, 111.5)      | 65.0 (35.0, 116.0)       |         |
| PLT          | n                 | 24                      | 43                       | 0.10211 |
|              | Me(Q1, Q3)        | 21.05 (18.10, 24.30)    | 22.20 (20.63, 27.90)     |         |
| LS           | n                 | 24                      | 42                       | 0.21494 |
|              | Me(Q1, Q3)        | 7.60 (5.15, 11.70)      | 6.35 (4.80, 7.80)        |         |
| CAP          | n                 | 24                      | 42                       | 0.29532 |
|              | Me(Q1, Q3)        | 327.0 (297.5, 347.5)    | 315.5 (290.0, 339.0)     |         |
| M2BPGi       | n                 | 23                      | 43                       | 0.12494 |
|              | Me(Q1, Q3)        | 0.920 (0.748, 1.485)    | 0.860 (0.573, 1.143)     |         |
| FIB-4        | n                 | 24                      | 43                       | 0.24984 |
|              | Me(Q1, Q3)        | 1.7361 (1.2648, 3.1551) | 1.52735 (1.0950, 2.5014) |         |

Number (N), Medium (Me), Q1, and Q3 represent the first and third quartiles. Aminotransferase (AST; 10-40 U/L), alanine aminotransferase (ALT; 5-40 U/L), platelet count (PLT; M: 13.1-26.2, W: 13-36.9×10<sup>4</sup>/μL), Fibrosis-4 (Fib-4), Liver stiffness (LS: kPa), controlled attenuation parameter (CAP; dB/m), macrophage galactose-specific lectin-2 binding protein glycosylation isomer [M2BPGi; <1 cutoff index (C.O.I.)], Hypertension (HT), Hyperlipidemia (HL), diabetes mellitus (DM), Body mass index (BMI), BMIG OB is obesity (BMI >25).

Table SII. In MASLD, the relationship between changes in clinical factors and the dLSM2B group.

| dLSM2B/MASLD |            | Decrease             | Increase           | P value  |
|--------------|------------|----------------------|--------------------|----------|
| dAST         | n          | 24                   | 43                 | 0.00012  |
|              | Me(Q1, Q3) | -34.5 (-51.5, -16.5) | -5.0 (-23.0, 2.8)  |          |
| dASTG        | Decrease   | 23 (95.8)            | 26 (60.5)          | 0.00174  |
|              | no         | 1 (4.2)              | 17 (39.5)          |          |
| dALT         | n          | 24                   | 43                 | 0.00054  |
|              | Me(Q1, Q3) | -46.5 (-71.5, -23.0) | -9.0 (-40.5, 1.8)  |          |
| dALTG        | Decrease   | 23 (95.8)            | 32 (74.4)          | 0.04372  |
|              | no         | 1 (4.2)              | 11 (25.6)          |          |
| dPLT         | n          | 24                   | 43                 | 0.15210  |
|              | Me(Q1, Q3) | -0.3 (-1.8, 1.7)     | -1.0 (-3.0, 0.4)   |          |
| dPLTG        | Increase   | 9 (37.5)             | 12 (27.9)          | 0.41702  |
|              | no         | 15 (62.5)            | 31 (72.1)          |          |
| dLS          | n          | 24                   | 42                 | 0.00001  |
|              | Me(Q1, Q3) | -2.4 (-3.2, -0.9)    | 0.0 (-1.0, 1.7)    |          |
| dCAP         | n          | 24                   | 42                 | 0.03817  |
|              | Me(Q1, Q3) | -54.0 (-78.0, -8.0)  | -19.0(-42.0, 12.0) |          |
| dM2BPGi      | n          | 20                   | 41                 | <0.00001 |
|              | Me(Q1, Q3) | -0.2 (-0.4, -0.1)    | 0.1 (0.0, 0.2)     |          |
| dFIB-4       | n          | 24                   | 43                 | 0.00015  |
|              | Me(Q1, Q3) | -0.3 (-1.0, -0.1)    | 0.0 (-0.3, 0.3)    |          |

Number (N), Medium (Me), Q1, and Q3 represent the first and third quartiles.

Table SIII. In MASLD, the relation among difference of clinical factors

|         | dBW%    | dAST    | dALT    | dLS     | dCAP    | dM2BPGi | dFIB-4  |
|---------|---------|---------|---------|---------|---------|---------|---------|
| dBW%    | ----    | 0.3386  | 0.3492  | 0.2295  | 0.4466  | 0.3460  | 0.1696  |
|         |         | 0.00506 | 0.00378 | 0.06382 | 0.00017 | 0.00631 | 0.17007 |
| dAST    | 0.3386  | ----    | 0.8837  | 0.0087  | 0.2434  | 0.1031  | 0.6571  |
|         | 0.00506 |         | 0.00000 | 0.94459 | 0.04894 | 0.42935 | 0.00000 |
| dALT    | 0.3492  | 0.8837  | ----    | 0.1239  | 0.2891  | 0.2301  | 0.4813  |
|         | 0.00378 | 0.00000 |         | 0.32177 | 0.01857 | 0.07443 | 0.00004 |
| dLS     | 0.2295  | 0.0087  | 0.1239  | ----    | 0.3144  | 0.6183  | 0.2050  |
|         | 0.06382 | 0.94459 | 0.32177 |         | 0.01014 | 0.00000 | 0.09865 |
| dCAP    | 0.4466  | 0.2434  | 0.2891  | 0.3144  | ----    | 0.3979  | 0.3199  |
|         | 0.00017 | 0.04894 | 0.01857 | 0.01014 |         | 0.00164 | 0.00883 |
| dM2BPGi | 0.3460  | 0.1031  | 0.2301  | 0.6183  | 0.3979  | ----    | 0.4101  |
|         | 0.00631 | 0.42935 | 0.07443 | 0.00000 | 0.00164 |         | 0.00103 |
| dFIB-4  | 0.1696  | 0.6571  | 0.4813  | 0.2050  | 0.3199  | 0.4101  | ----    |
|         | 0.17007 | 0.00000 | 0.00004 | 0.09865 | 0.00883 | 0.00103 |         |

Upper panel is correlation coefficient and lower is P-value.

Table SIV. In MetALD, the relationship between the factors at entry and alcohol grade.

| MetALD grade 1/2 |            | 1                      | 2                      | P value |
|------------------|------------|------------------------|------------------------|---------|
| Sex              | Woman      | 13 (61.9)              | 2 (16.7)               | 0.01205 |
|                  | Man        | 8 (38.1)               | 10 (83.3)              |         |
| Age              | n          | 21                     | 12                     | 0.97015 |
|                  | Me(Q1, Q3) | 65.1 (55.8, 71.1)      | 65.3 (54.6, 71.1)      |         |
| BMI              | n          | 21                     | 12                     | 0.54932 |
|                  | Me(Q1, Q3) | 28.4 (24.6, 29.8)      | 24.9 (23.3, 29.9)      |         |
| AST              | n          | 21                     | 12                     | 0.83683 |
|                  | Me(Q1, Q3) | 55.0 (27.0, 70.5)      | 56.5 (36.5, 85.5)      |         |
| ALT              | n          | 21                     | 12                     | 0.52450 |
|                  | Me(Q1, Q3) | 65.0 (34.5, 88.3)      | 57.0 (40.0, 70.5)      |         |
| PLT              | n          | 21                     | 12                     | 0.60020 |
|                  | Me(Q1, Q3) | 19.30 (15.70, 25.33)   | 17.45 (12.65, 23.80)   |         |
| LS               | n          | 20                     | 12                     | 0.03723 |
|                  | Me(Q1, Q3) | 7.20 (5.55, 8.90)      | 13.45 (6.90, 21.45)    |         |
| CAP              | n          | 20                     | 12                     | 0.92247 |
|                  | Me(Q1, Q3) | 287.5 (264.0, 340.0)   | 296.0 (274.5, 333.0)   |         |
| M2BPGi           | n          | 21                     | 12                     | 0.32129 |
|                  | Me(Q1, Q3) | 1.040 (0.828, 1.815)   | 1.655 (0.855, 2.730)   |         |
| FIB-4            | n          | 21                     | 12                     | 0.31228 |
|                  | Me(Q1, Q3) | 2.1266(1.5099, 3.7357) | 2.5568(2.0166, 3.5332) |         |
| HT               | HT         | 11 (52.4)              | 6 (50.0)               | 0.89526 |
|                  | 0          | 10 (47.6)              | 6 (50.0)               |         |
| HL               | HL         | 8 (38.1)               | 2 (16.7)               | 0.25931 |
|                  | 0          | 13 (61.9)              | 10 (83.3)              |         |
| DM               | 0          | 15 (71.4)              | 9 (75.0)               | 1.00000 |
|                  | DM         | 6 (28.6)               | 3 (25.0)               |         |

The amount of alcohol consumed (ALD score) was defined as grade 1 for 30-45 g of alcohol for men and 20g-35g for women, and grade 2 for 45-60 g for men and 35-50 g for women. Number (N), Medium (Me), Q1, and Q3 represent the first and third quartiles.

Table SV. Relationship between changes in clinical factors and alcohol grade in patients with MetALD.

| MetALD garedel/2 |            | 1                    | 2                   | P value |
|------------------|------------|----------------------|---------------------|---------|
| dAST             | n          | 21                   | 12                  | 0.44274 |
|                  | Me(Q1, Q3) | -13.0 (-40.3, -3.8)  | -13.5 (-34.0, 0.0)  |         |
| dALT             | n          | 21                   | 12                  | 0.22365 |
|                  | Me(Q1, Q3) | -27.0 (-48.0, -3.8)  | -12.5 (-36.5, 1.5)  |         |
| dPLT             | n          | 21                   | 12                  | 0.42077 |
|                  | Me(Q1, Q3) | -0.1 (-1.5, 1.9)     | -0.6 (-2.3, 0.8)    |         |
| dLS              | n          | 20                   | 12                  | 0.84563 |
|                  | Me(Q1, Q3) | -1.3 (-2.2, 0.5)     | -0.2 (-4.7, 1.3)    |         |
| dCAP             | n          | 20                   | 12                  | 0.05156 |
|                  | Me(Q1, Q3) | -32.0 (-73.5, -11.0) | -10.0 (-39.5, 26.5) |         |
| dM2BPGi          | n          | 19                   | 11                  | 0.89726 |
|                  | Me(Q1, Q3) | -0.1 (-0.3, 0.2)     | -0.2 (-0.4, 0.2)    |         |
| dFIB-4           | n          | 21                   | 12                  | 0.38937 |
|                  | Me(Q1, Q3) | -0.3 (-0.7, 0.1)     | 0.0 (-1.0, 0.7)     |         |
| dLSM2B           | Decrease   | 9 (42.9)             | 4 (33.3)            | 0.71882 |
|                  | Increase   | 12 (57.1)            | 8 (66.7)            |         |

The amount of alcohol consumed (ALD score) was defined as grade 1 for 30g-45g of alcohol for men and 20g-35g for women, and grade 2 for 45-60g for men and 35g-50g for women. Number (N), Medium (Me), Q1, and Q3 represent the first and third quartiles.
